# Supplementary material
Source: PubMed Central journal article supplement (PMC3401512)
Supplement: NIHMS368742-supplement-1_si_001.pdf [file NIHMS368742-supplement-1_si_001.pdf]

## Supporting Information

### Bacterial biosynthesis and maturation of the didemnin anticancer agents

Ying Xu<sup>†</sup>, Roland D. Kersten<sup>‡</sup>, Sang-Jip Nam<sup>‡</sup>, Liang Lu<sup>†</sup>, Abdulaziz M. Al-Suwailem<sup>§</sup>, Huajun Zheng<sup>||</sup>, William Fenical<sup>‡</sup>, Pieter C. Dorrestein<sup>‡,⊥</sup>, Bradley S. Moore<sup>‡,⊥,\*</sup>, Pei-Yuan Qian<sup>†,\*</sup>

<sup>†</sup>KAUST Global Collaborative Research, Division of Life Science, School of Science, Hong Kong University of Science and Technology, Clear Water Bay, Hong Kong, China;

<sup>‡</sup>Center for Marine Biotechnology and Biomedicine, Scripps Institution of Oceanography, University of California San Diego, La Jolla, California 92093, USA;

<sup>§</sup>The Coastal and Marine Resources Core Lab, Red Sea Research Center, 4700 King Abdullah University of Science and Technology, Thuwal, Makkah 23955-6900, Kingdom of Saudi Arabia;

<sup>||</sup>Shanghai-MOST Key Laboratory of Health and Disease Genomics, Chinese National Human Genome Center at Shanghai, 250 Bi Bo Road, Shanghai 201203, China;

<sup>⊥</sup>Skaggs School of Pharmacy and Pharmaceutical Sciences, University of California at San Diego, La Jolla, California 92093, USA

\*Corresponding Authors: Pei-Yuan Qian, Phone: 852-2358-7331, Fax: 852-2358-1559, Email: [boqianpy@ust.hk](mailto:boqianpy@ust.hk) and

Bradley S. Moore, Phone: 858-822-6650, Fax: 858-534-1305, Email: [bsmoore@ucsd.edu](mailto:bsmoore@ucsd.edu).

# Supporting Information

## Supplementary Figures

**a** FTMS - HF26-30

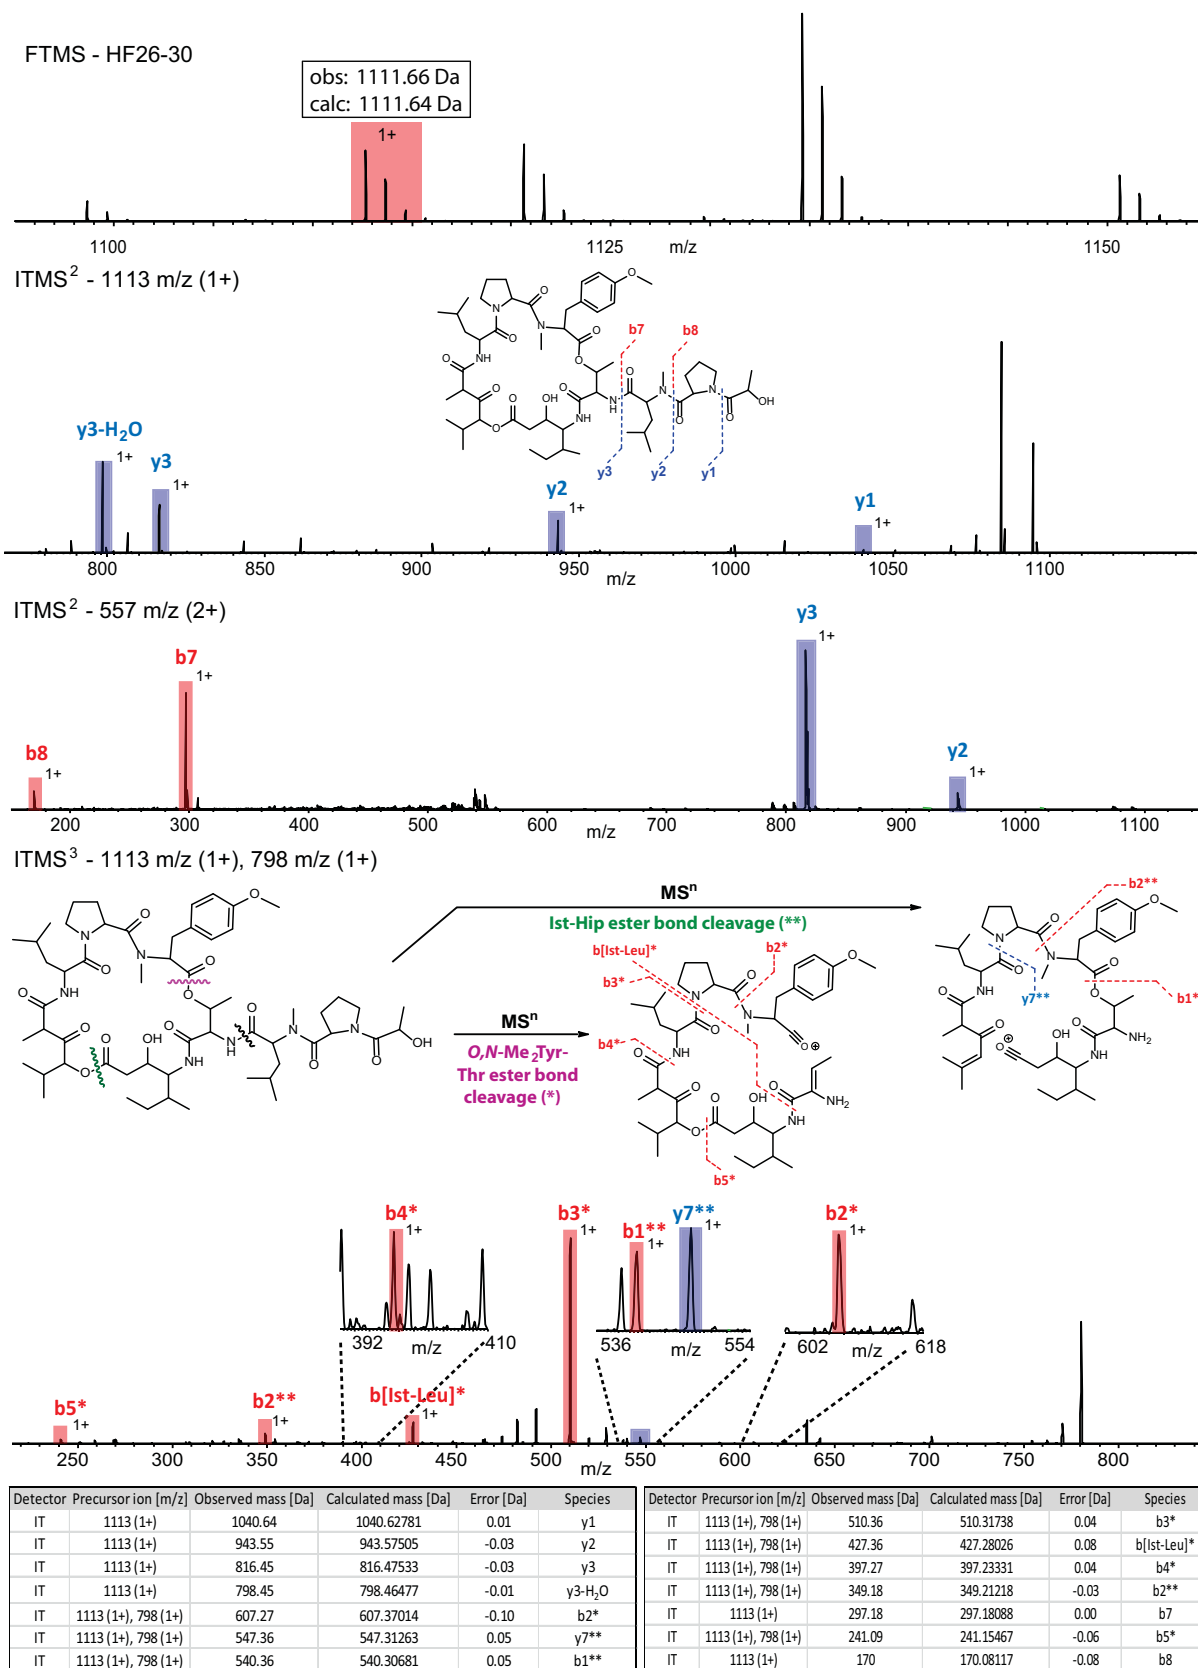

**Fig. S1. Characterization of didemnin B. (a)** MS<sup>n</sup> analysis.

**b**

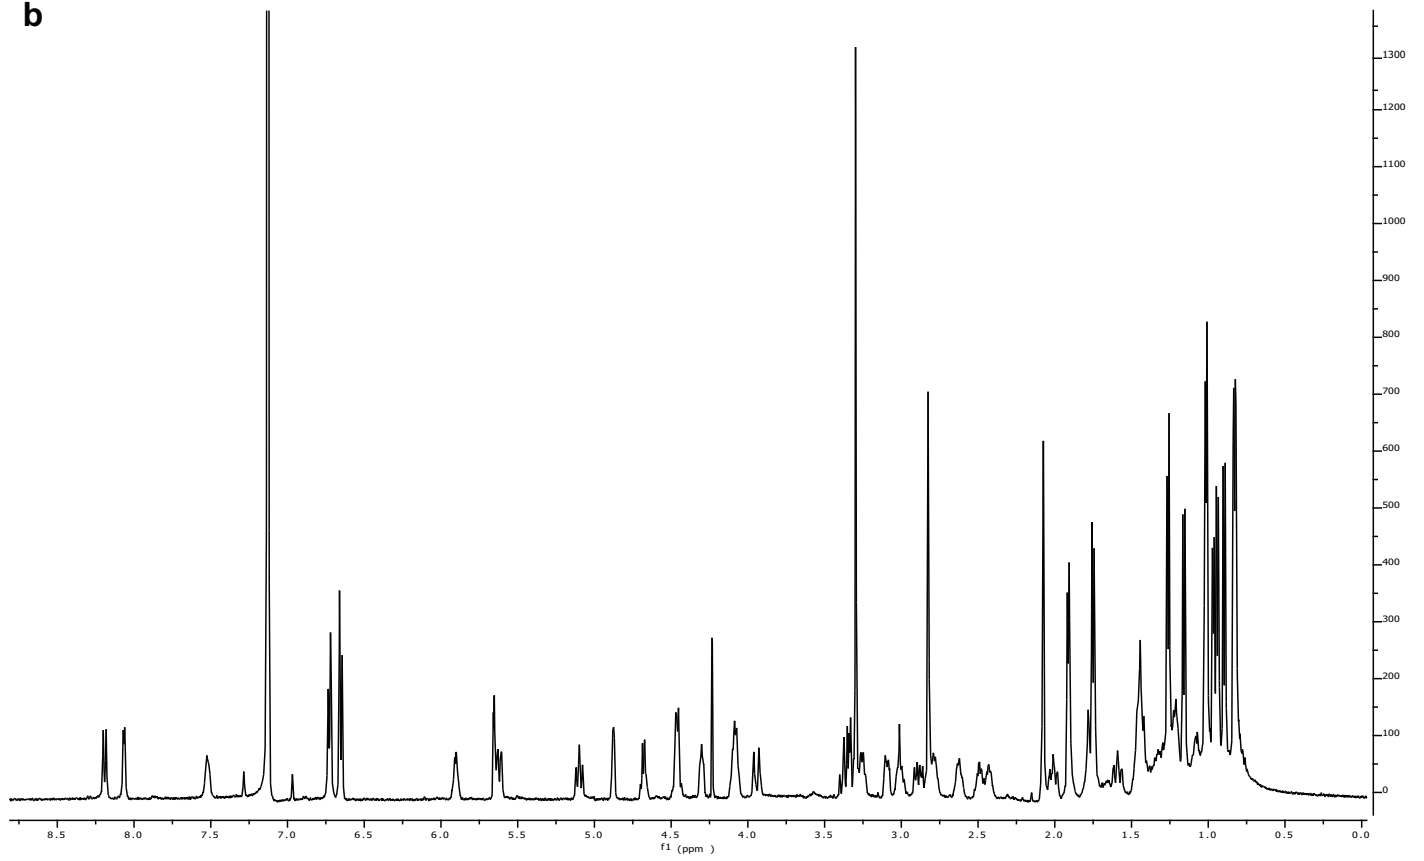

**Fig. S1. Characterization of didemnin B. (b)  $^1\text{H}$  NMR spectrum.**

a

FTMS - HF26-30

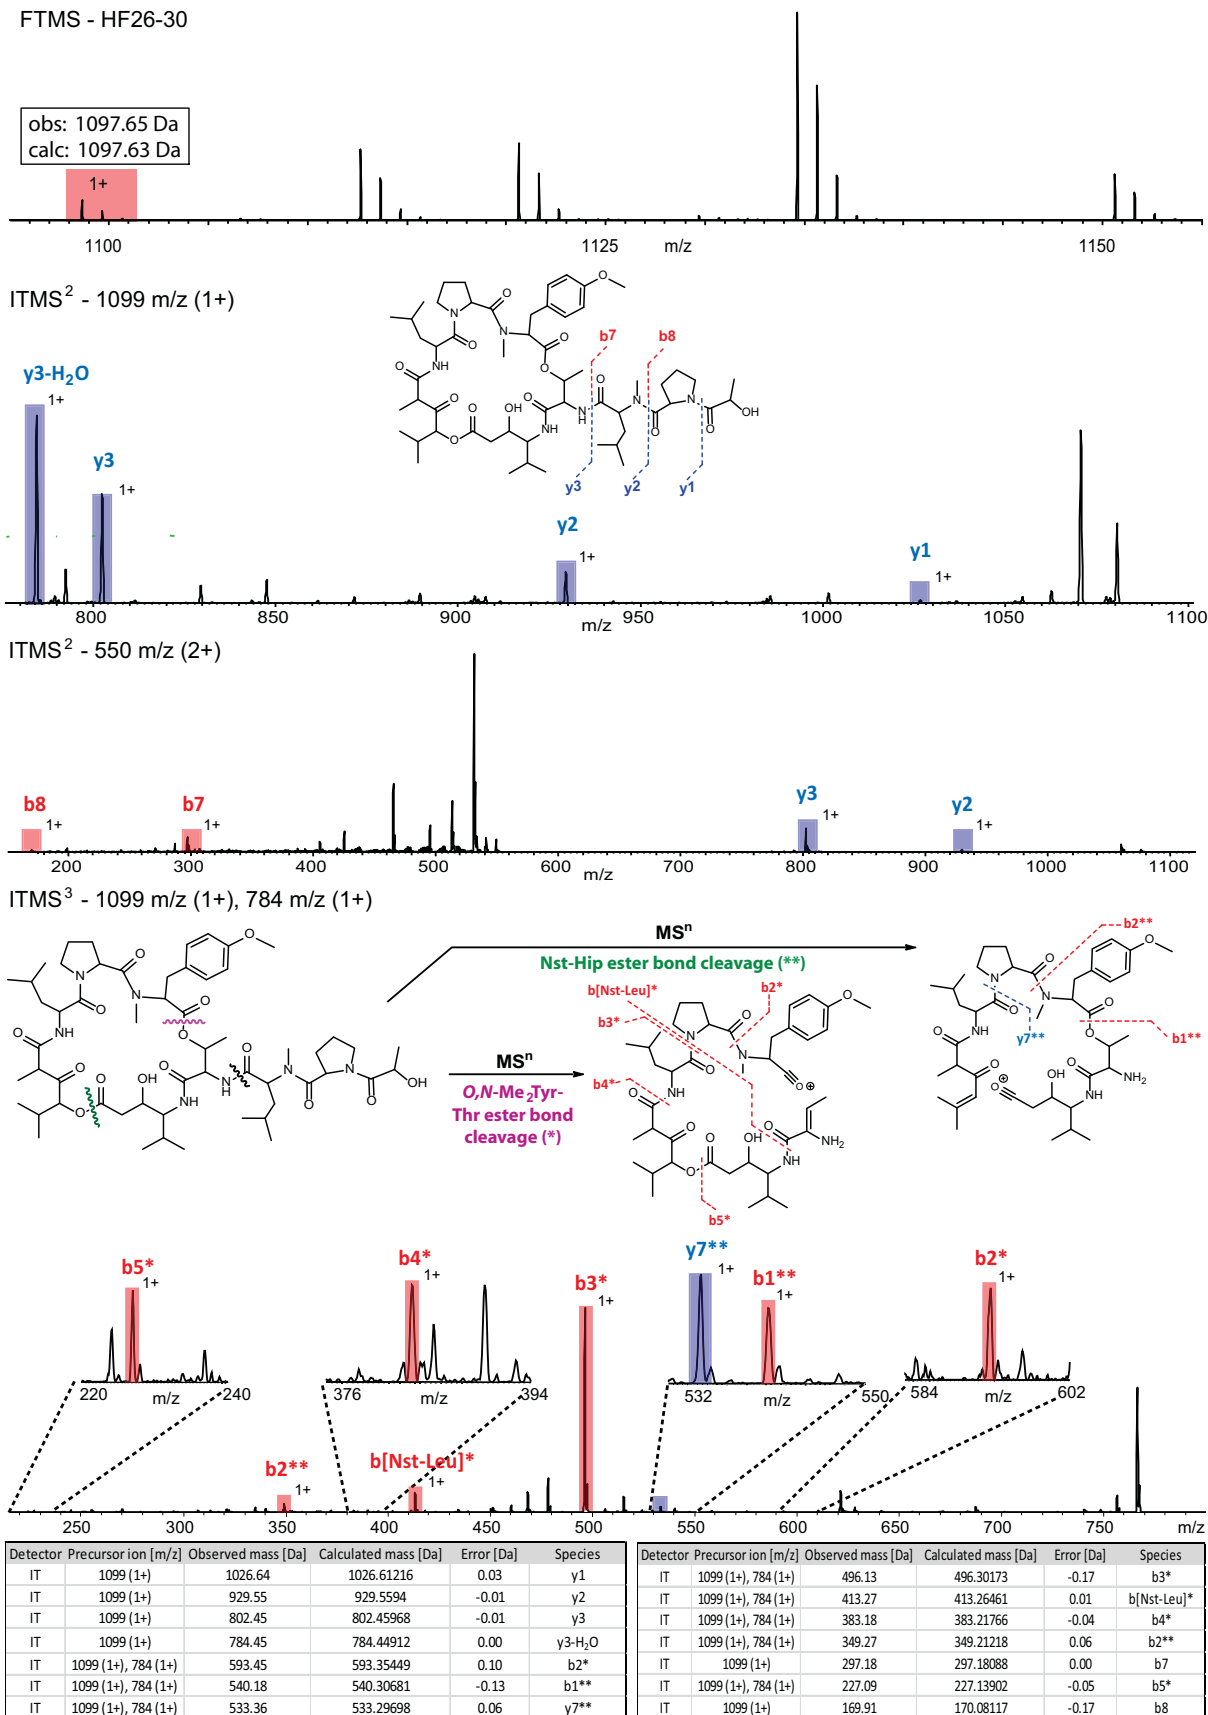Fig. S2. Characterization of nordidemnin B. (a) MS<sup>n</sup> analysis.

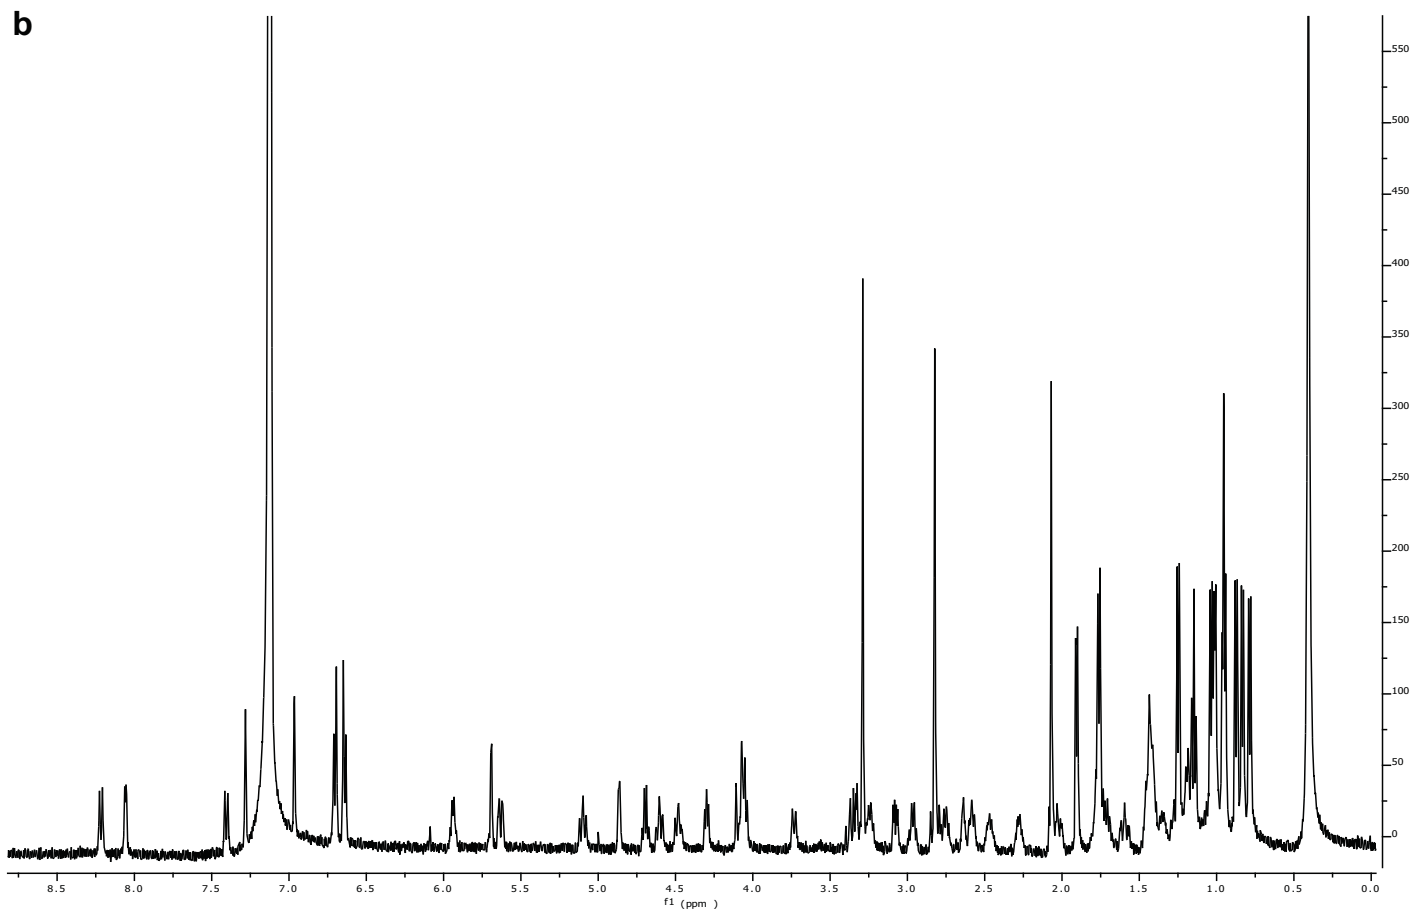

Fig. S2. Characterization of nordidemnin B. (b)  $^1\text{H}$  NMR spectrum.

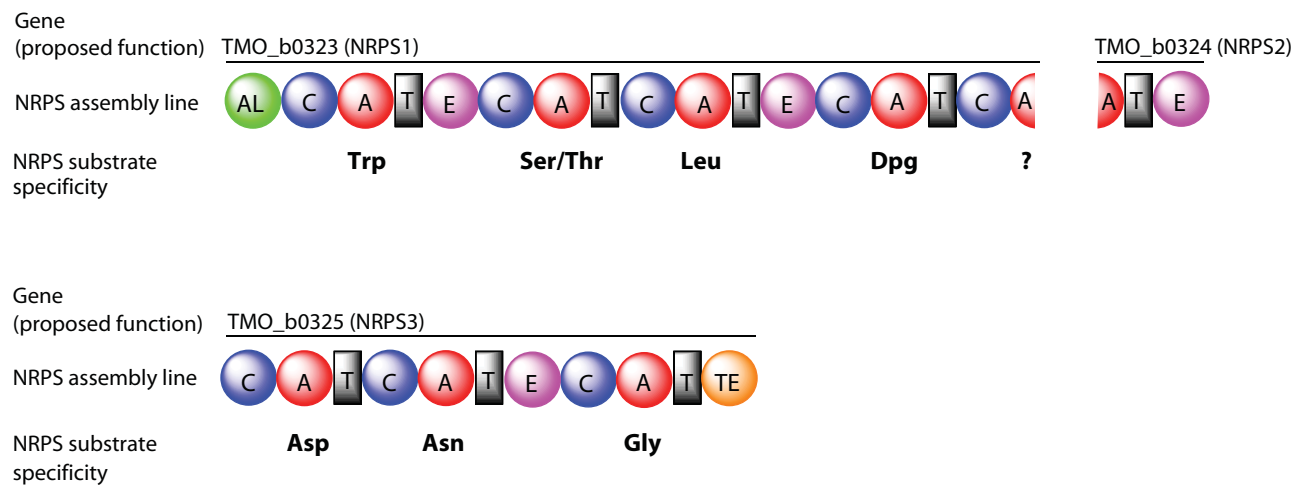

**Fig. S3. Bioinformatic analysis of uncharacterized *nrs1* gene cluster on plasmid 2 in the *T. mobilis* KA081020-065 genome.** Domain notation: AL, acyl ligase; C, condensation domain; A, adenylation domain; T, thiolation domain; E, epimerization; TE, thioesterase. Substrate abbreviation: Dpg, dihydroxyphenylglycine.

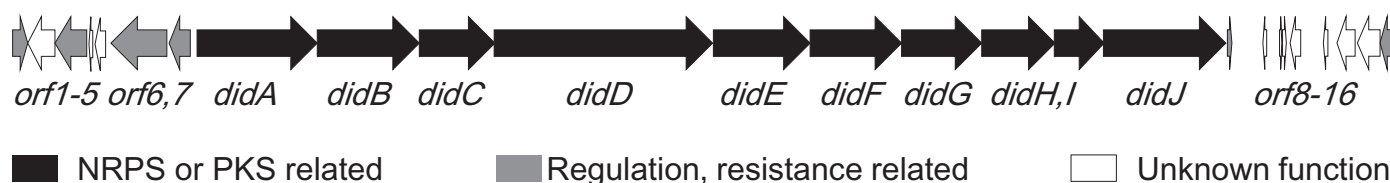

| Gene        | Size [aa] | Sequence similarity/organism                                                                 | Proposed function | Identity/similarity | GenBank accession no. |
|-------------|-----------|----------------------------------------------------------------------------------------------|-------------------|---------------------|-----------------------|
| <i>orf1</i> | 261       | Thioesterase, <i>Actinomadura kijaniata</i>                                                  | Thioesterase      | 41%, 54%            | ACB46473              |
| <i>orf2</i> | 483       | Membrane protease subunit stomatin/prohibitin-like protein, $\alpha$ -proteobacterium BAL199 | Putative protease | 42%, 59%            | ZP_02189733           |
| <i>orf3</i> | 560       | Cyclic peptide transporter, <i>Methylobacter tundripaludum</i> SV96                          | Transporter       | 48%, 68%            | ZP_07653047           |
| <i>orf4</i> | 70        | None                                                                                         | Hypothetical      |                     |                       |
| <i>orf5</i> | 190       | GTPase domain-containing protein, <i>Methylobacter tundripaludum</i> SV96                    | Hypothetical      | 39%, 57%            | ZP_07653048           |
| <i>orf6</i> | 987       | Hydrophobic/amphiphilic exporter-1, <i>Azospirillum</i> sp. B510                             | Resistance        | 38%, 56%            | YP_003450508          |
| <i>orf7</i> | 377       | Secretion protein, <i>Azospirillum</i> sp. B510                                              | Resistance        | 28%, 47%            | YP_003450507          |
| <i>didA</i> | 2123      | OciA protein, <i>Planktothrix rubescens</i> NIVA-CYA 98                                      | NRPS              | 29%, 40%            | CAQ48254              |
| <i>didB</i> | 1796      | Linear gramicidin synthetase subunit D, <i>Stigmatella aurantiaca</i> DW4/3-1                | NRPS              | 36%, 48%            | ZP_01459555           |
| <i>didC</i> | 1330      | NRPS, <i>Myxococcus xanthus</i> DK 1622                                                      | NRPS              | 41%, 52%            | YP_632257             |
| <i>didD</i> | 3853      | Amino acid adenylation domain protein, <i>Streptomyces violaceusniger</i> Tu 4113            | NRPS              | 39%, 50%            | ZP_07603194           |
| <i>didE</i> | 1705      | Amino acid adenylation domain protein, <i>Acetivibrio cellulolyticus</i> CD2                 | NRPS/PKS          | 36%, 53%            | ZP_07325073           |
| <i>didF</i> | 1613      | HctF, <i>Lyngbya majuscula</i>                                                               | NRPS              | 35%, 52%            | AAV42398              |
| <i>didG</i> | 1413      | NRPS/PKS, <i>Amycolatopsis mediterranei</i> U32                                              | PKS               | 46%, 56%            | YP_003765866          |
| <i>didH</i> | 1286      | NRPS/PKS, <i>Myxococcus xanthus</i> DK 1622                                                  | NRPS              | 39%, 53%            | YP_631961             |
| <i>didI</i> | 873       | NRPS, <i>Myxococcus xanthus</i> DK 1622                                                      | NRPS              | 39%, 52%            | YP_632257             |
| <i>didJ</i> | 2163      | Amino acid adenylation domain protein, <i>Lyngbya majuscula</i> 3L                           | NRPS              | 36%, 53%            | ZP_08431746           |

**Fig. S4. Organization and deduced functions of the open reading frames within and flanking the didemnin biosynthetic gene cluster.**

| Gene         | Size [aa] | Sequence similarity/organism                                                          | Proposed function | Identity/similarity | GenBank accession no. |
|--------------|-----------|---------------------------------------------------------------------------------------|-------------------|---------------------|-----------------------|
| <i>orf8</i>  | 77        | MbtH domain-containing protein, <i>Herpetosiphon aurantiacus</i> ATCC 23779           | MbtH-like protein | 80%, 89%            | YP_001542806          |
| <i>orf9</i>  | 68        | Hypothetical protein, <i>Acidovorax</i> sp. JS42                                      | Hypothetical      | 79%, 91%            | YP_986866             |
| <i>orf10</i> | 45        | None                                                                                  | Hypothetical      |                     |                       |
| <i>orf11</i> | 60        | None                                                                                  | Hypothetical      |                     |                       |
| <i>orf12</i> | 190       | Hypothetical protein, <i>Acidovorax</i> sp. JS42                                      | Hypothetical      | 94%, 97%            | YP_986861             |
| <i>orf13</i> | 75        | Hypothetical protein, <i>Acidovorax</i> sp. JS42                                      | Hypothetical      | 98%, 100%           | YP_004387524          |
| <i>orf14</i> | 324       | CAAX amino terminal protease family, <i>Synechococcus</i> sp. PCC 7335                | Putative protease | 30%, 49%            | ZP_05035401           |
| <i>orf15</i> | 398       | Cyanate transport system protein, <i>Pseudomonas syringae</i> pv. <i>syringae</i> 642 | Transport         | 40%, 52%            | ZP_07265073           |
| <i>orf16</i> | 255       | GntR family transcriptional regulator, <i>Chromobacterium violaceum</i> ATCC 12472    | Regulation        | 39%, 55%            | NP_903400             |

**Fig. S4, continued. Organization and deduced functions of the open reading frames within and flanking the didemnins biosynthetic gene cluster.**



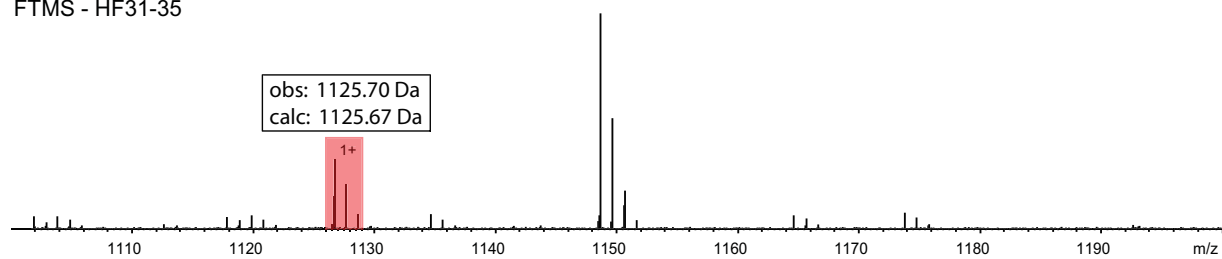

ITMS<sup>2</sup> - 1127 m/z (1+)

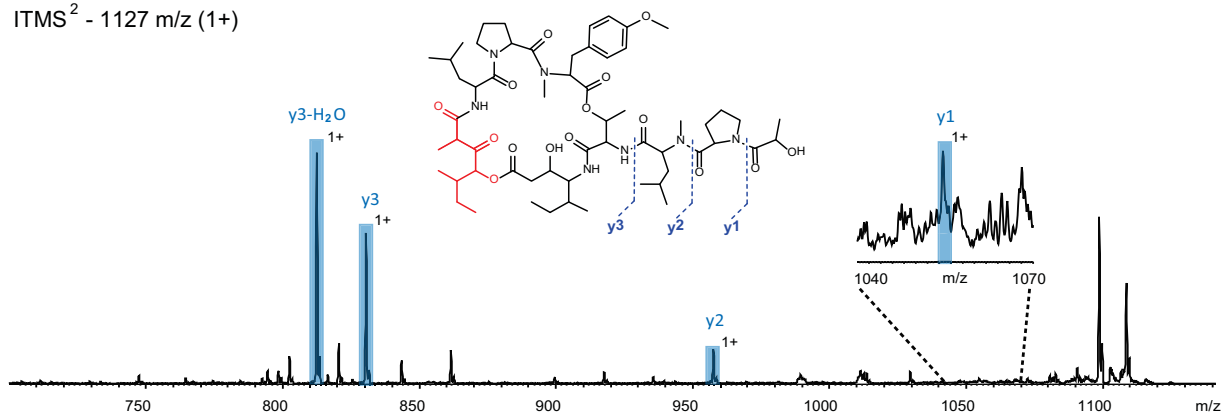

ITMS<sup>3</sup> - 1127 m/z (1+), 812 (1+)

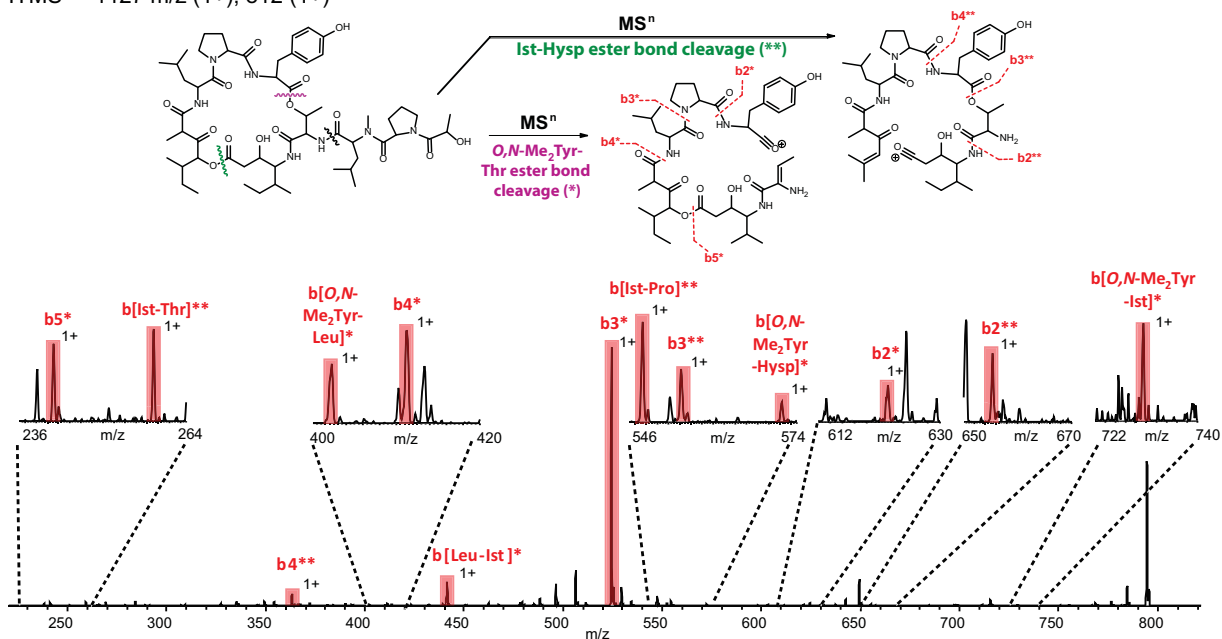

| Detector | Precursor ion [m/z] | Observed mass [Da] | Calculated mass [Da] | Error [Da] | Species                          |
|----------|---------------------|--------------------|----------------------|------------|----------------------------------|
| IT       | 1127 (1+)           | 1054.64            | 1054.64346           | 0.00       | y1                               |
| IT       | 1127 (1+)           | 957.55             | 957.59070            | -0.04      | y2                               |
| IT       | 1127 (1+)           | 830.45             | 830.49098            | -0.04      | y3                               |
| IT       | 1127 (1+)           | 812.45             | 812.48042            | -0.03      | y3-H <sub>2</sub> O              |
| IT       | 1127 (1+), 812 (1+) | 729.45             | 729.44331            | 0.01       | b[O,N-Me <sub>2</sub> Tyr-Ist]*  |
| IT       | 1127 (1+), 812 (1+) | 655.36             | 655.37069            | -0.01      | b2**                             |
| IT       | 1127 (1+), 812 (1+) | 621.45             | 621.38634            | 0.06       | b2*                              |
| IT       | 1127 (1+), 812 (1+) | 572.36             | 572.33303            | 0.03       | b[O,N-Me <sub>2</sub> Tyr-Hysp]* |

  

| Detector | Precursor ion [m/z] | Observed mass [Da] | Calculated mass [Da] | Error [Da] | Species                         |
|----------|---------------------|--------------------|----------------------|------------|---------------------------------|
| IT       | 1127 (1+), 812 (1+) | 554.27             | 554.32301            | -0.05      | b3**                            |
| IT       | 1127 (1+), 812 (1+) | 547.36             | 547.31263            | 0.05       | b[Ist-Pro]**                    |
| IT       | 1127 (1+), 812 (1+) | 524.36             | 524.33358            | 0.03       | b3*                             |
| IT       | 1127 (1+), 812 (1+) | 441.36             | 441.29591            | 0.06       | b[Leu-Ist]*                     |
| IT       | 1127 (1+), 812 (1+) | 411.27             | 411.24951            | 0.02       | b4*                             |
| IT       | 1127 (1+), 812 (1+) | 402.24             | 402.23873            | 0.00       | b[O,N-Me <sub>2</sub> Tyr-Leu]* |
| IT       | 1127 (1+), 812 (1+) | 363.18             | 363.22838            | -0.05      | b4**                            |
| IT       | 1127 (1+), 812 (1+) | 259.18             | 259.16523            | 0.01       | b[Ist-Thr]**                    |
| IT       | 1127 (1+), 812 (1+) | 241.18             | 241.15522            | 0.02       | b5*                             |

Fig. S5. Characterization of didemnin B derivative [Hysp]didemnin B produced by *Tistrella mobilis* KA081020-065 due to putative NRPS substrate promiscuity in DidF A8 domain. MS<sup>n</sup> analysis of [Hysp]didemnin B. Hysp, α-(α-hydroxy sec-butylacetyl) propionic acid.

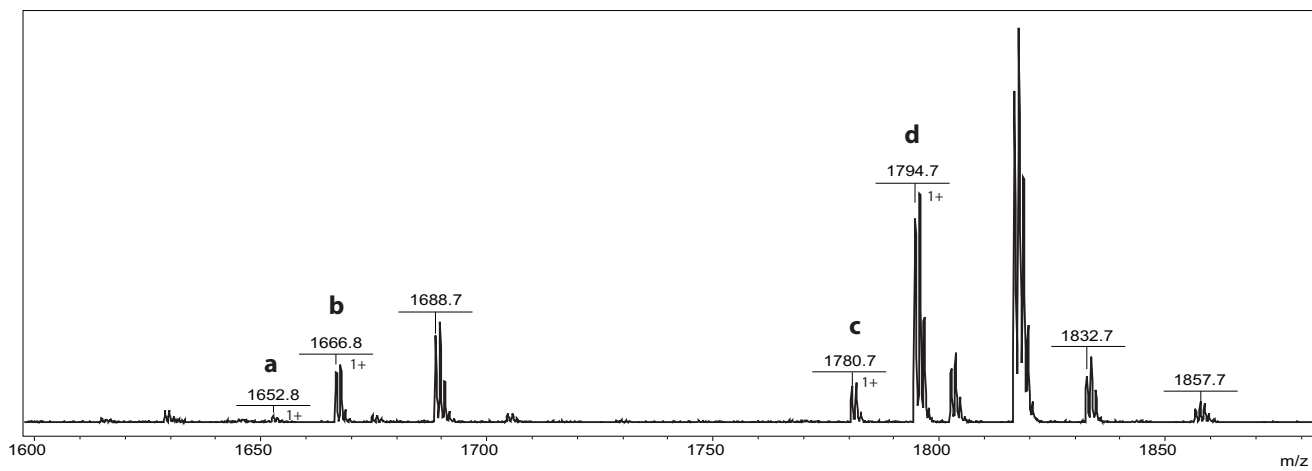

**Fig. S6. Detection of didemnin precursors in the extract of *Tistrella mobilis* KA081020-065 by MALDI-TOF MS.** a – Nordidemnin X ( $[M+H]^+$ , obs 1651.8 Da, calc 1651.9 Da), b – Didemnin X ( $[M+H]^+$ , obs 1665.8 Da, calc 1666.0), c – Nordidemnin Y ( $[M+H]^+$ , obs 1779.7 Da, calc 1780.0 Da), d – Didemnin Y ( $[M+H]^+$ , obs 1793.7 Da, calc 1794.0 Da).

**a** FTMS - HF28

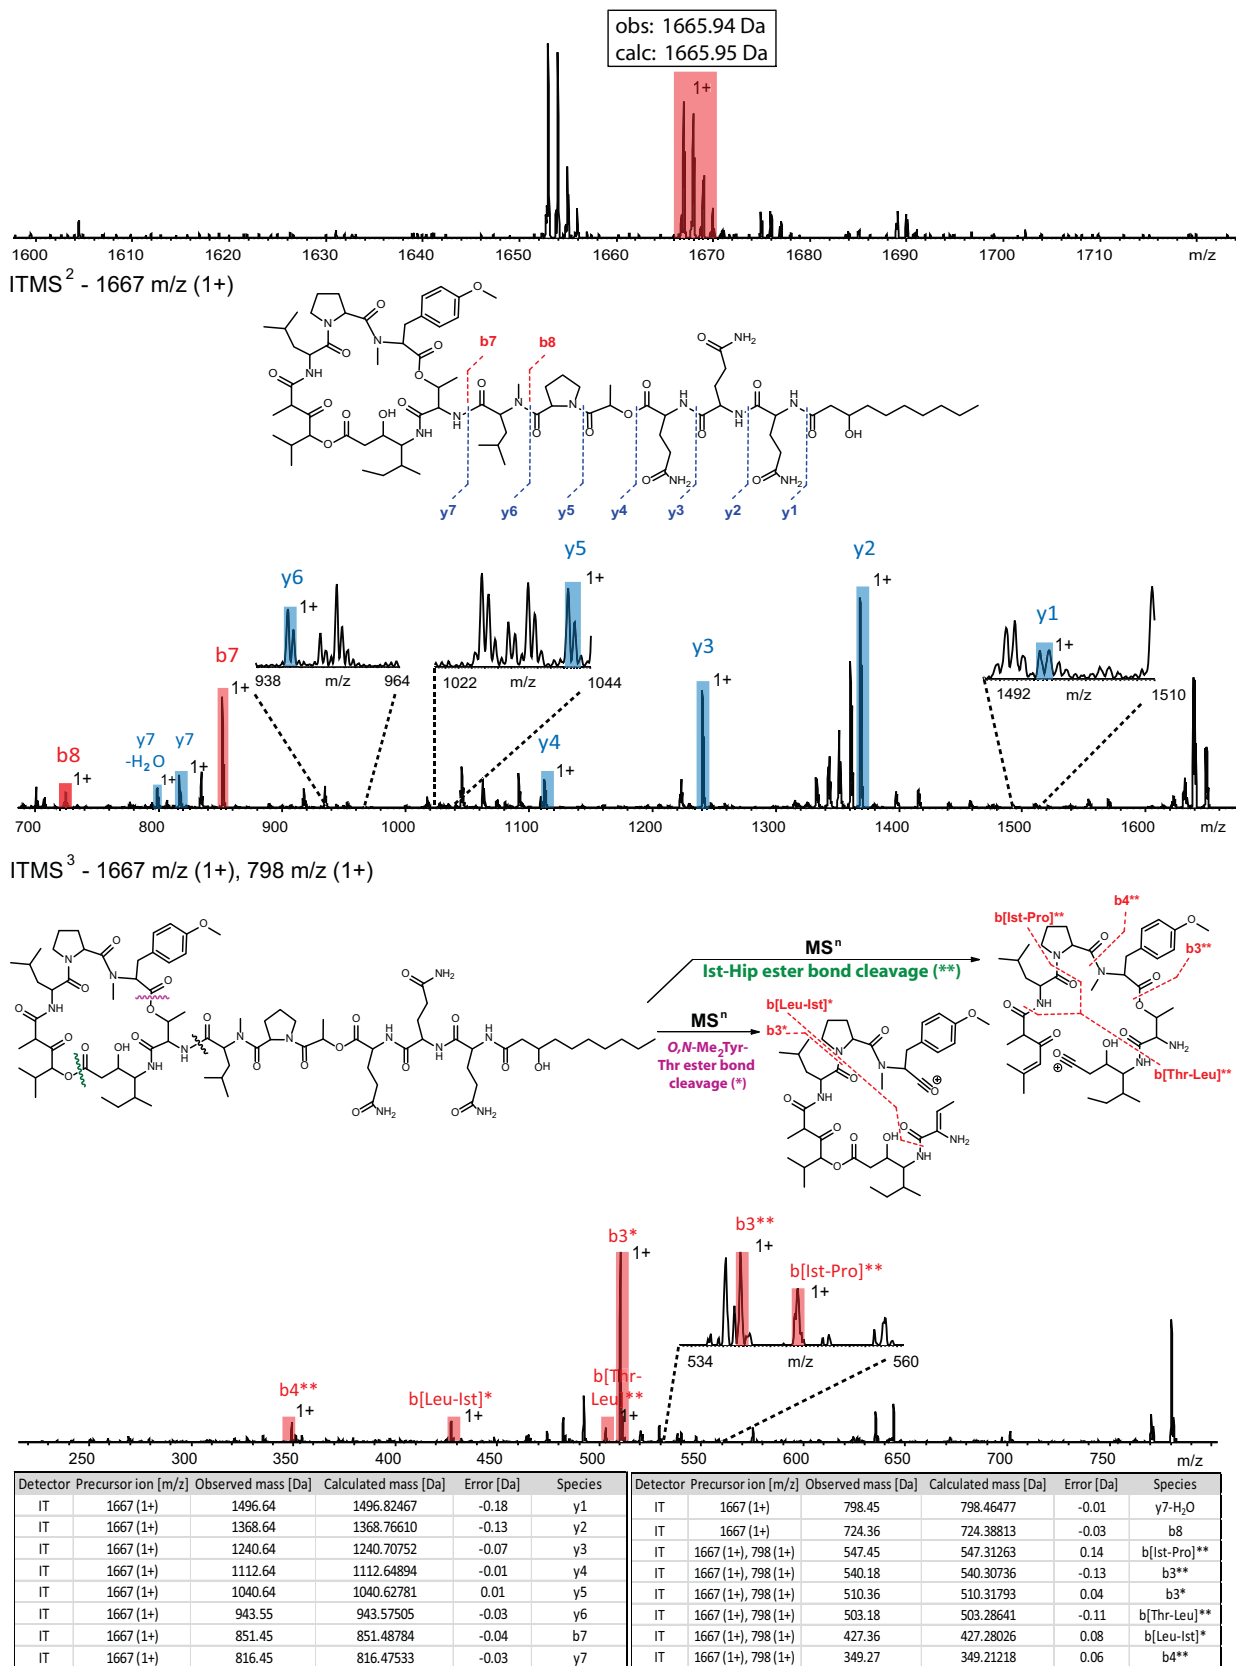

Fig. S7. Characterization of didemnin precursors by MS<sup>n</sup>. (a) MS<sup>n</sup> analysis of didemnin X.

**b** FTMS - HF28

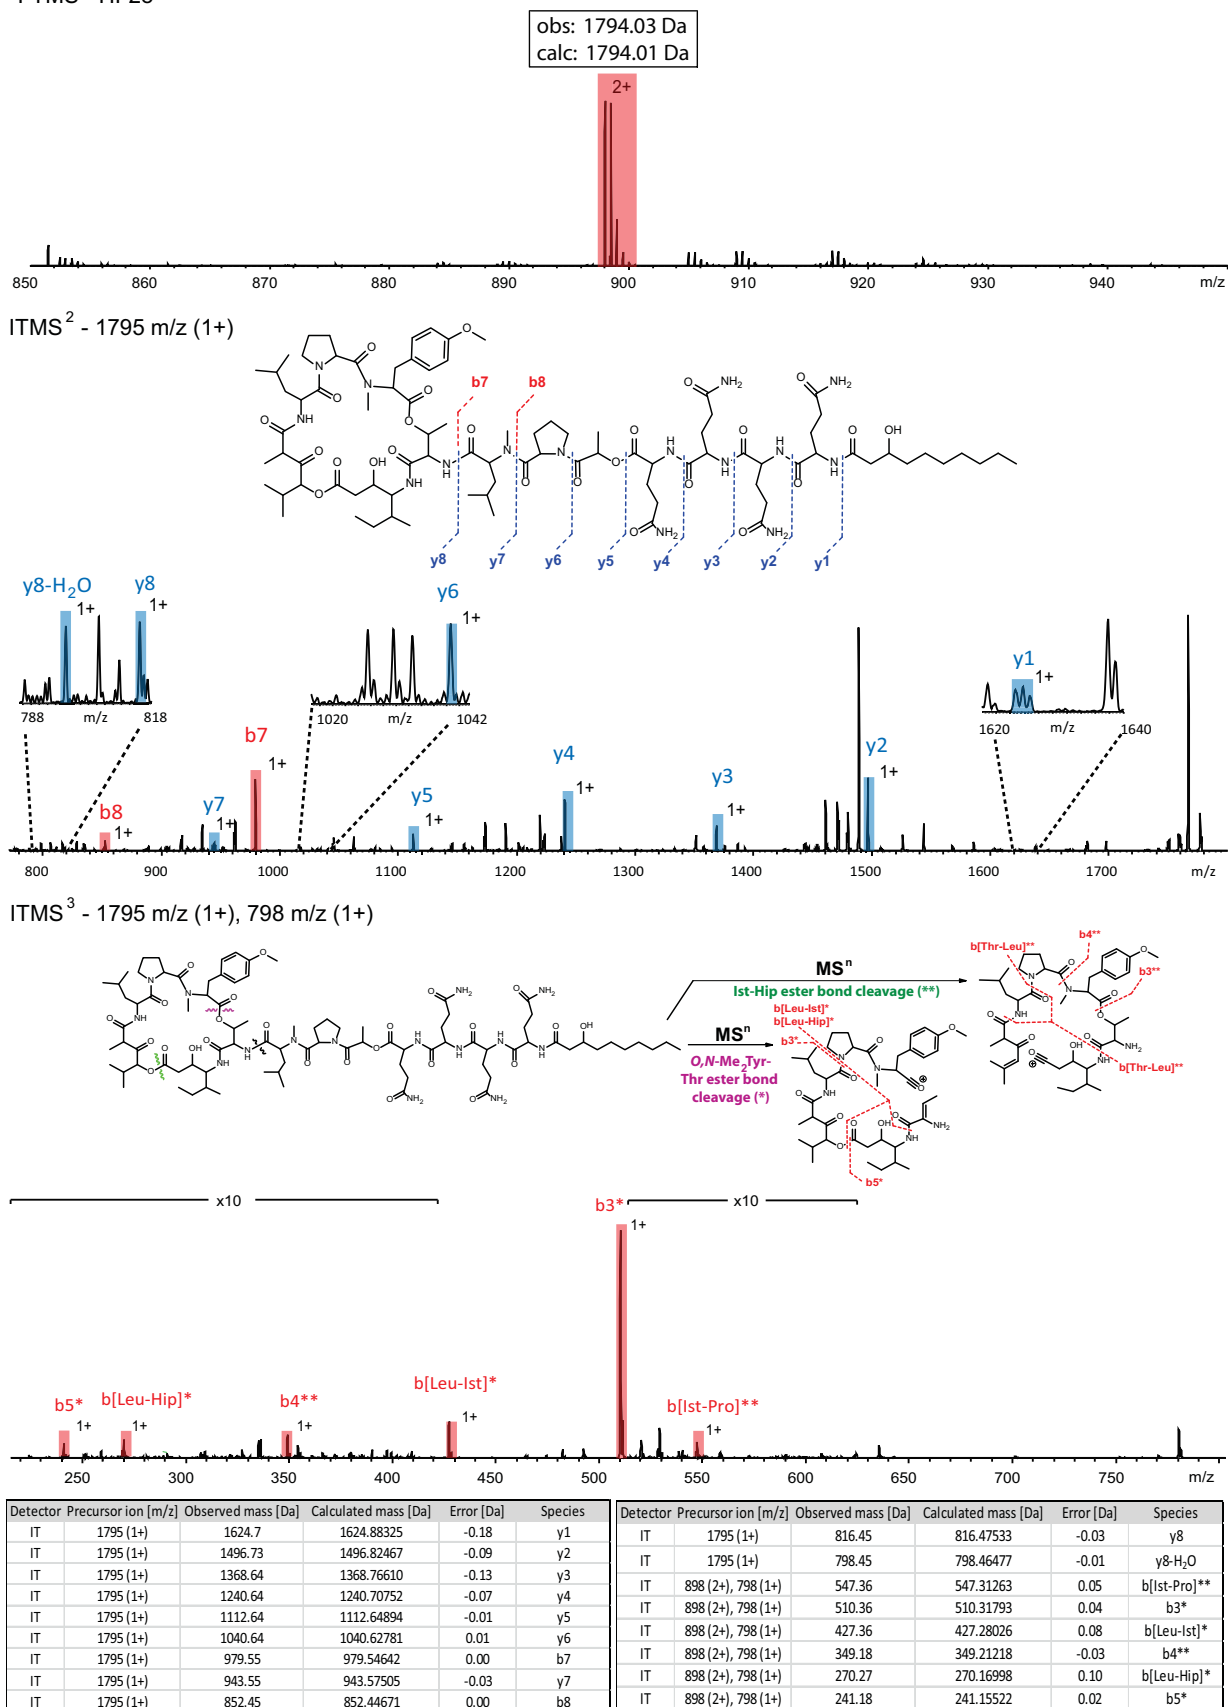

Fig. S7. Characterization of didemnin precursors by MS<sup>n</sup>. (b) MS<sup>n</sup> analysis of didemnin Y.

**C** FTMS - HF28

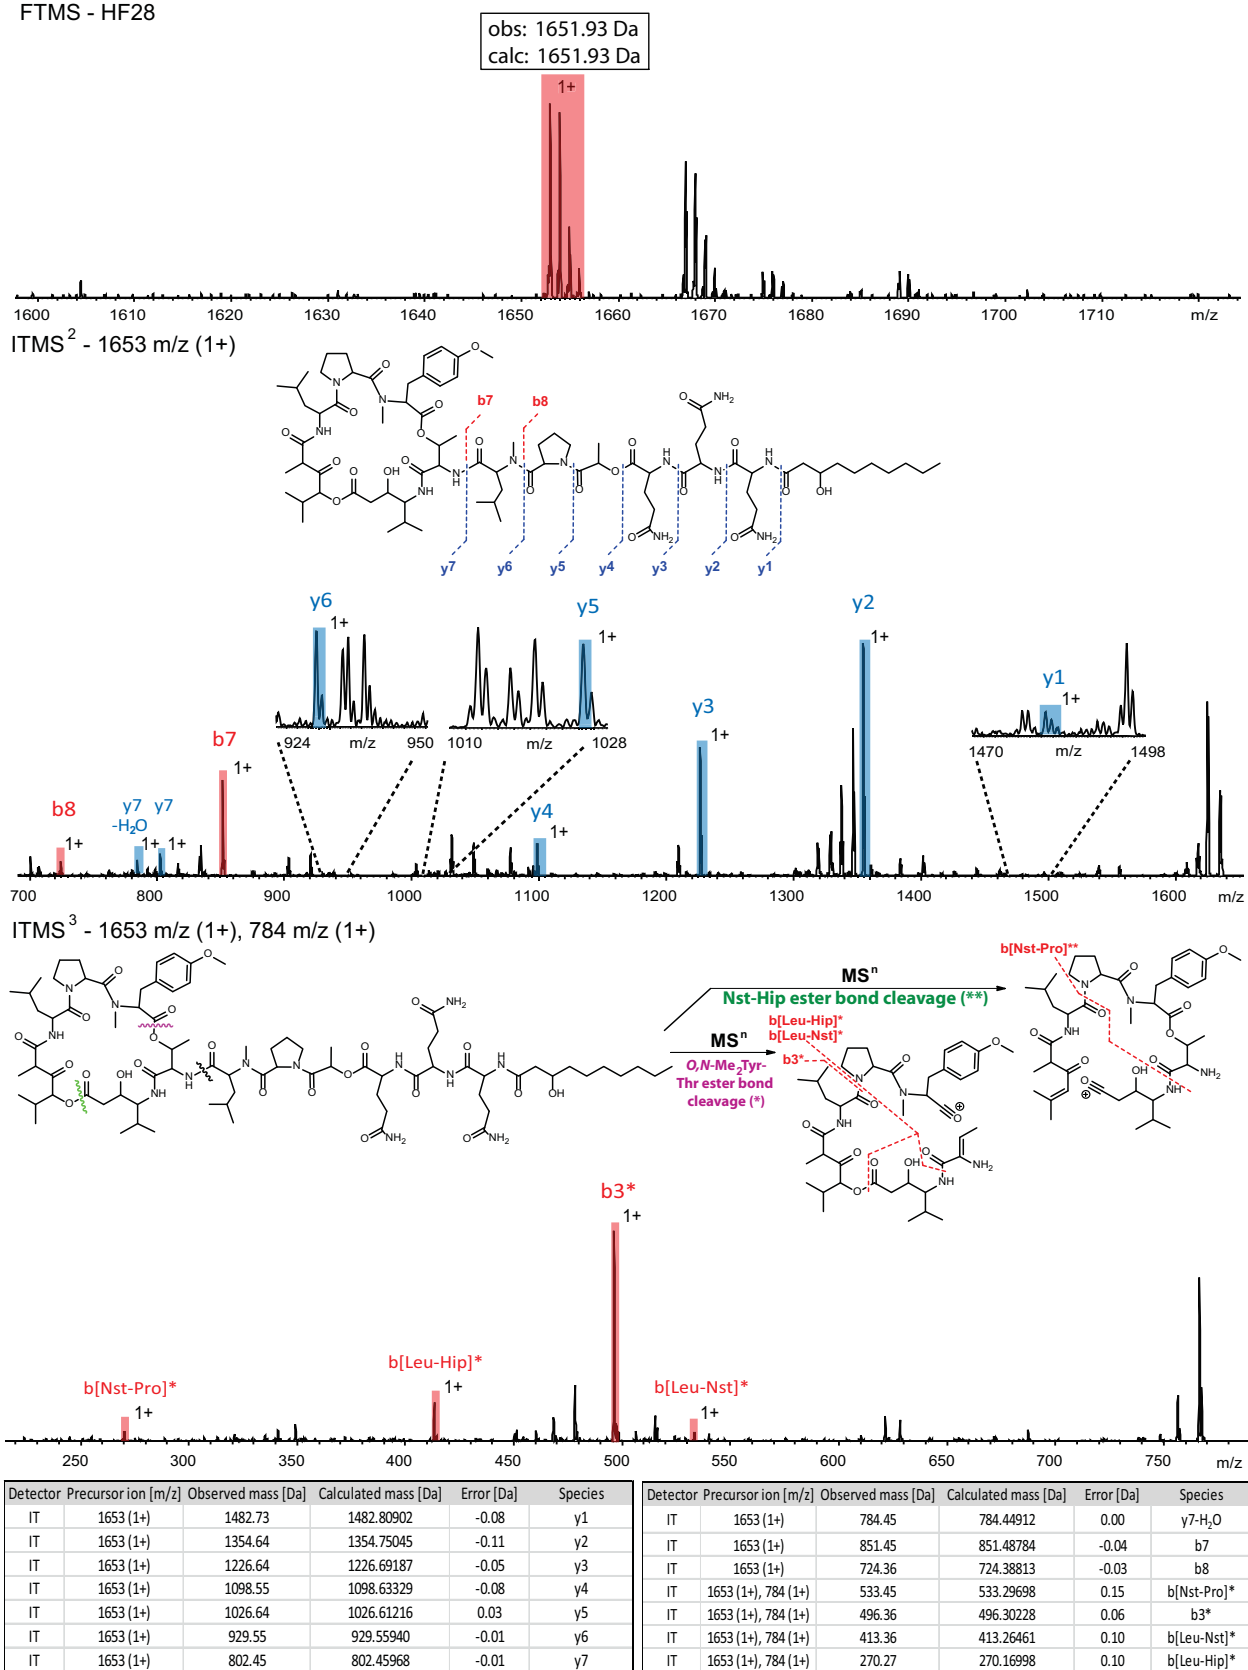

**Fig. S7. Characterization of didemnin precursors by MS<sup>n</sup>.** (c) MS<sup>n</sup> analysis of nordidemnin X.

**d** ITMS - HF26-30

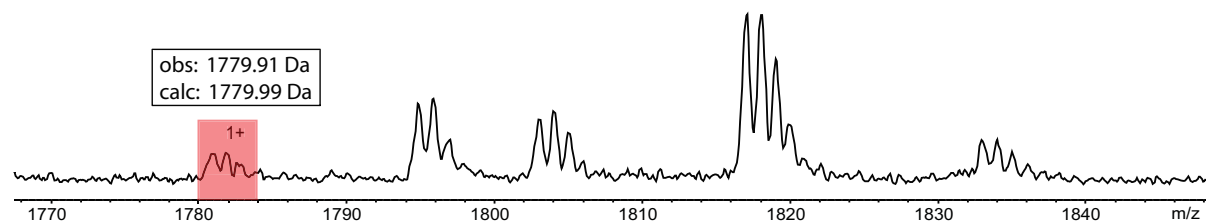

ITMS<sup>2</sup> - 1781 m/z (1+)

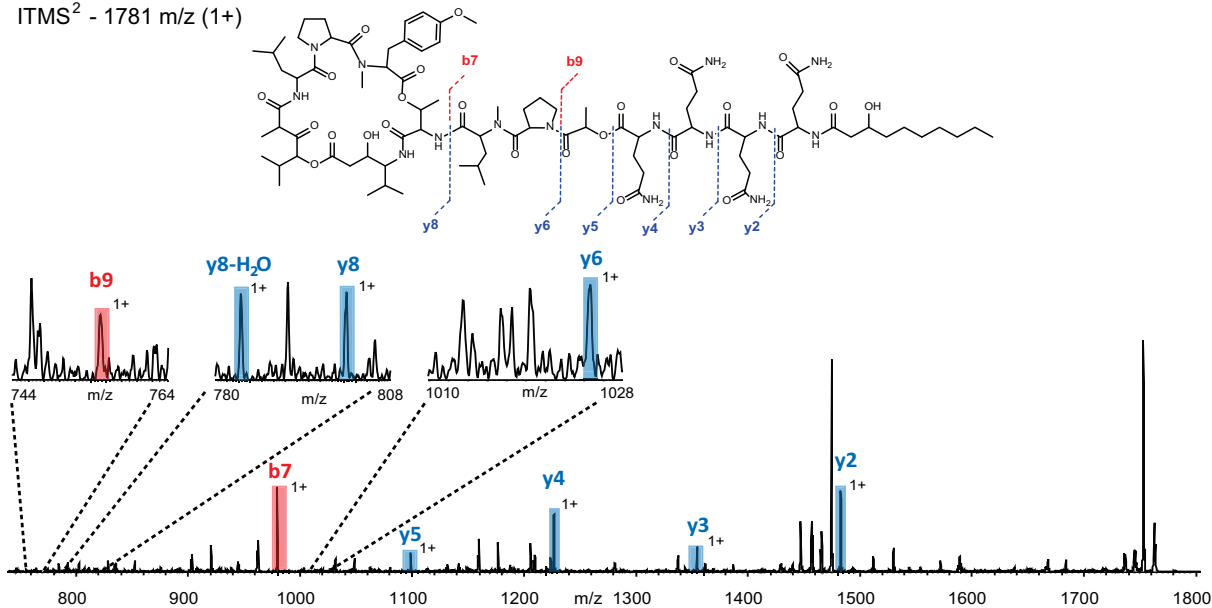

ITMS<sup>3</sup> - 1781 m/z (1+), 784 (1+)

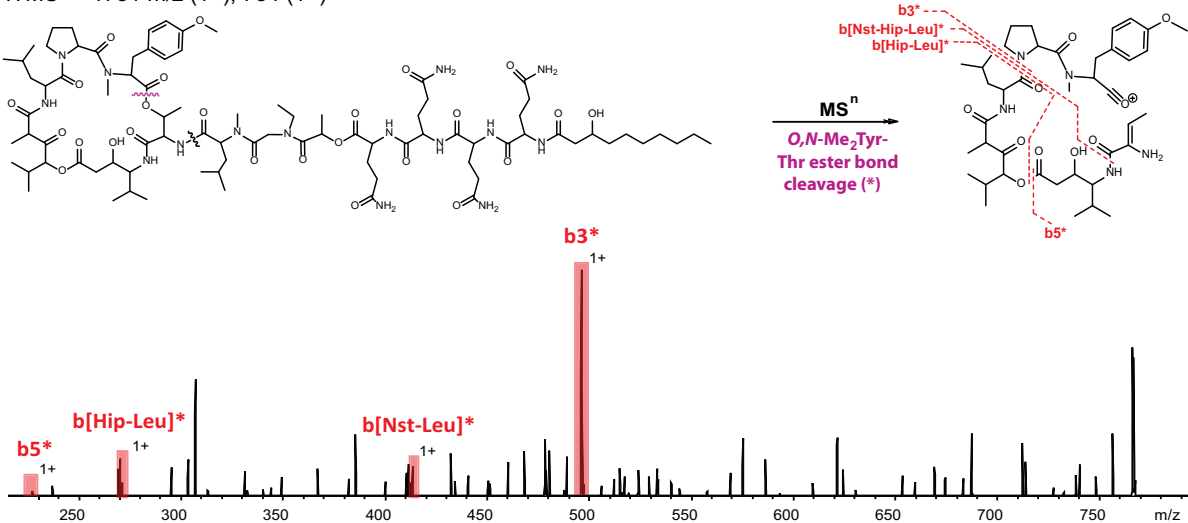

| Detector | Precursor ion [m/z] | Observed mass [Da] | Calculated mass [Da] | Error [Da] | Species |
|----------|---------------------|--------------------|----------------------|------------|---------|
| IT       | 1781 (1+)           | 1482.73            | 1482.80902           | 0.08       | y2      |
| IT       | 1781 (1+)           | 1354.64            | 1354.75045           | 0.11       | y3      |
| IT       | 1781 (1+)           | 1226.64            | 1226.69187           | 0.05       | y4      |
| IT       | 1781 (1+)           | 1098.64            | 1098.63329           | -0.01      | y5      |
| IT       | 1781 (1+)           | 1026.64            | 1026.61216           | -0.03      | y6      |
| IT       | 1781 (1+)           | 979.45             | 979.54642            | 0.10       | b7      |
| IT       | 1781 (1+)           | 802.45             | 802.45968            | 0.01       | y8      |

| Detector | Precursor ion [m/z] | Observed mass [Da] | Calculated mass [Da] | Error [Da] | Species     |
|----------|---------------------|--------------------|----------------------|------------|-------------|
| IT       | 1781 (1+)           | 784.45             | 784.44912            | 0.00       | y8-H2O      |
| IT       | 1781 (1+)           | 755.27             | 755.39394            | 0.12       | b9          |
| IT       | 1781 (1+), 784 (1+) | 496.36             | 496.30228            | -0.06      | b3*         |
| IT       | 1781 (1+), 784 (1+) | 413.36             | 413.26461            | -0.10      | b[Nst-Leu]* |
| IT       | 1781 (1+), 784 (1+) | 270.18             | 270.16998            | -0.01      | b[Hip-Leu]* |
| IT       | 1781 (1+), 784 (1+) | 227.13             | 227.13957            | 0.01       | b5*         |

Fig. S7. Characterization of didemnin precursors by MS<sup>n</sup>. (d) MS<sup>n</sup> analysis of nordidemnin Y.

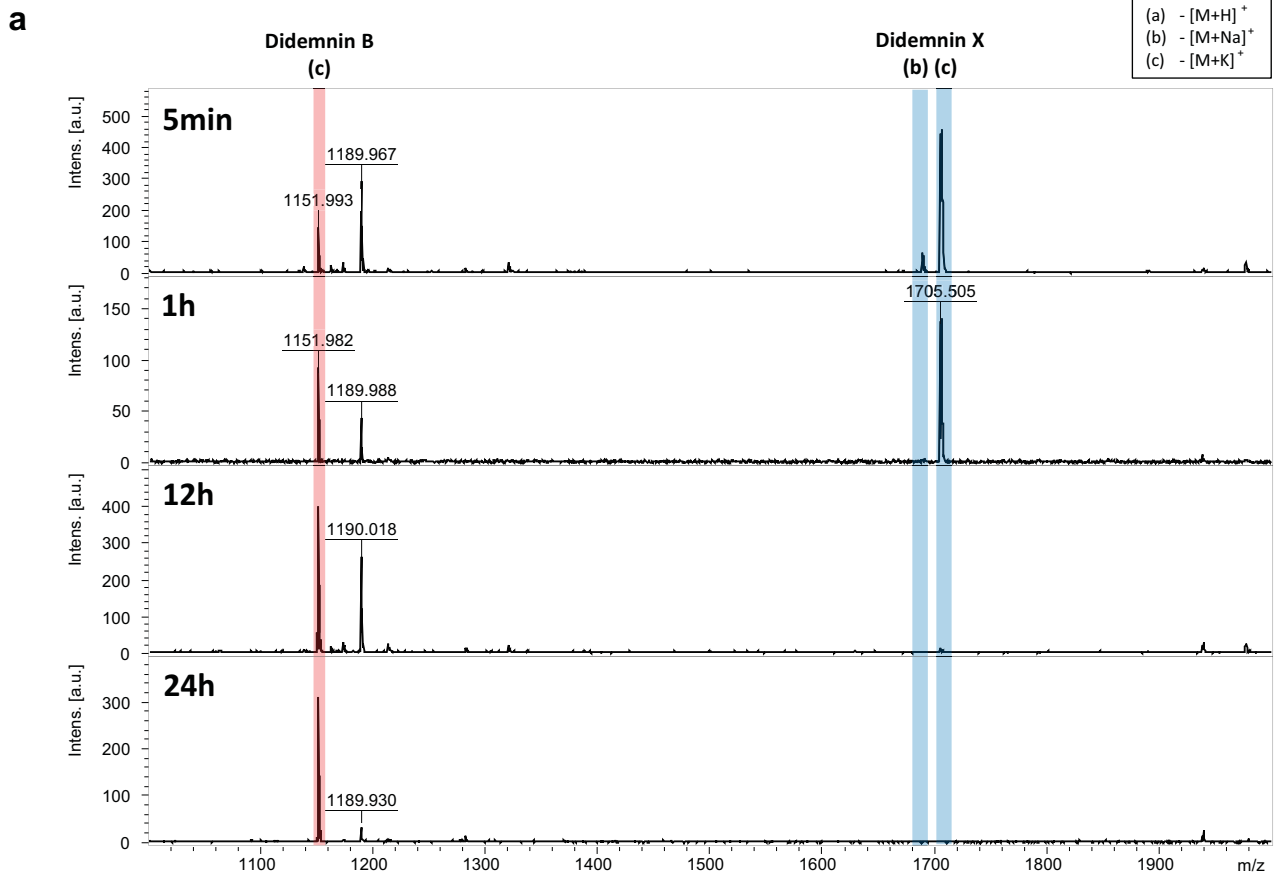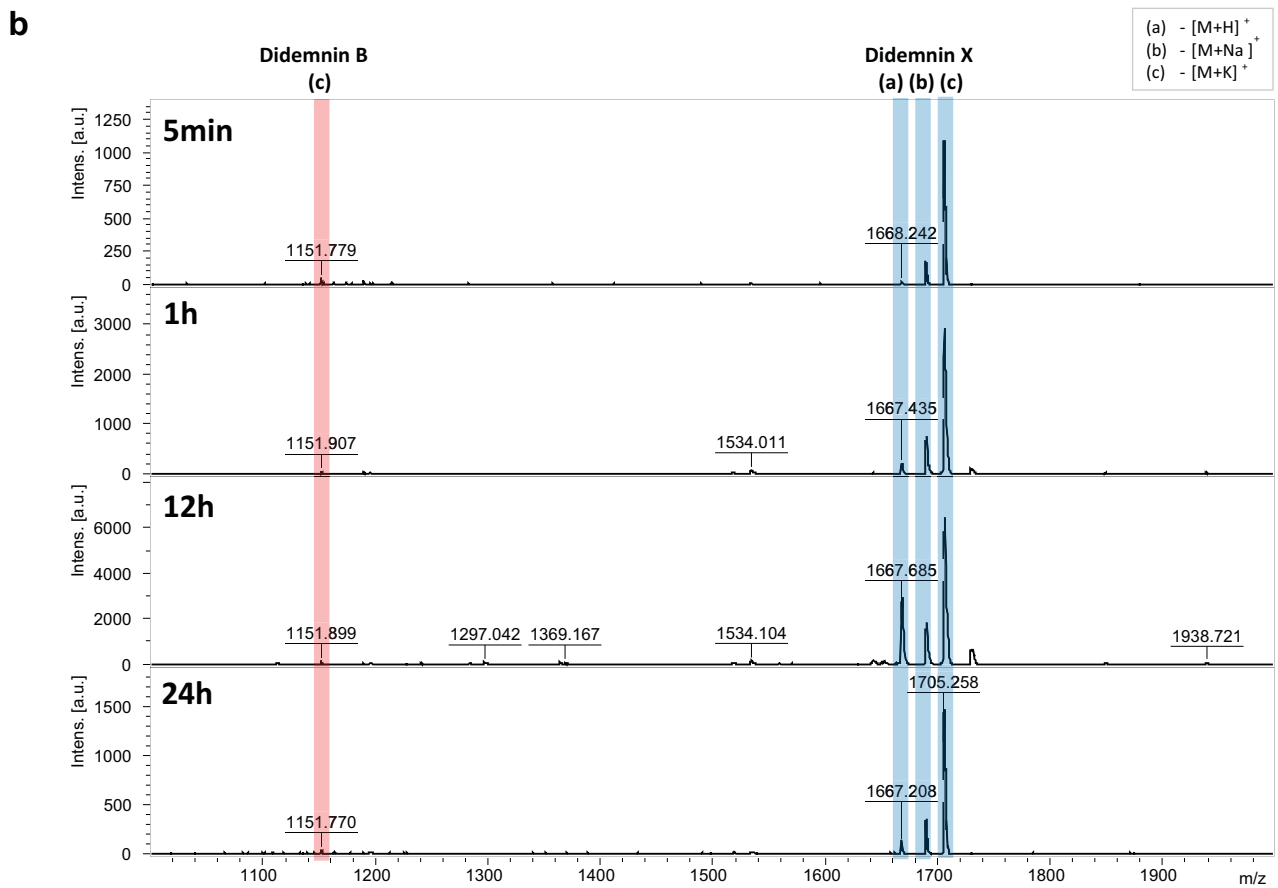

**Fig. S8. Didemnin precursor hydrolysis assay.** MALDI-TOF MS analysis of didemnin X hydrolysis time course in presence of *Tistrella mobilis* secreted proteome (**(a)**, 1d growth in liquid culture, >10kDa protein cutoff filter) and in presence of sterile GYP medium (**(b)**, negative control).

**c**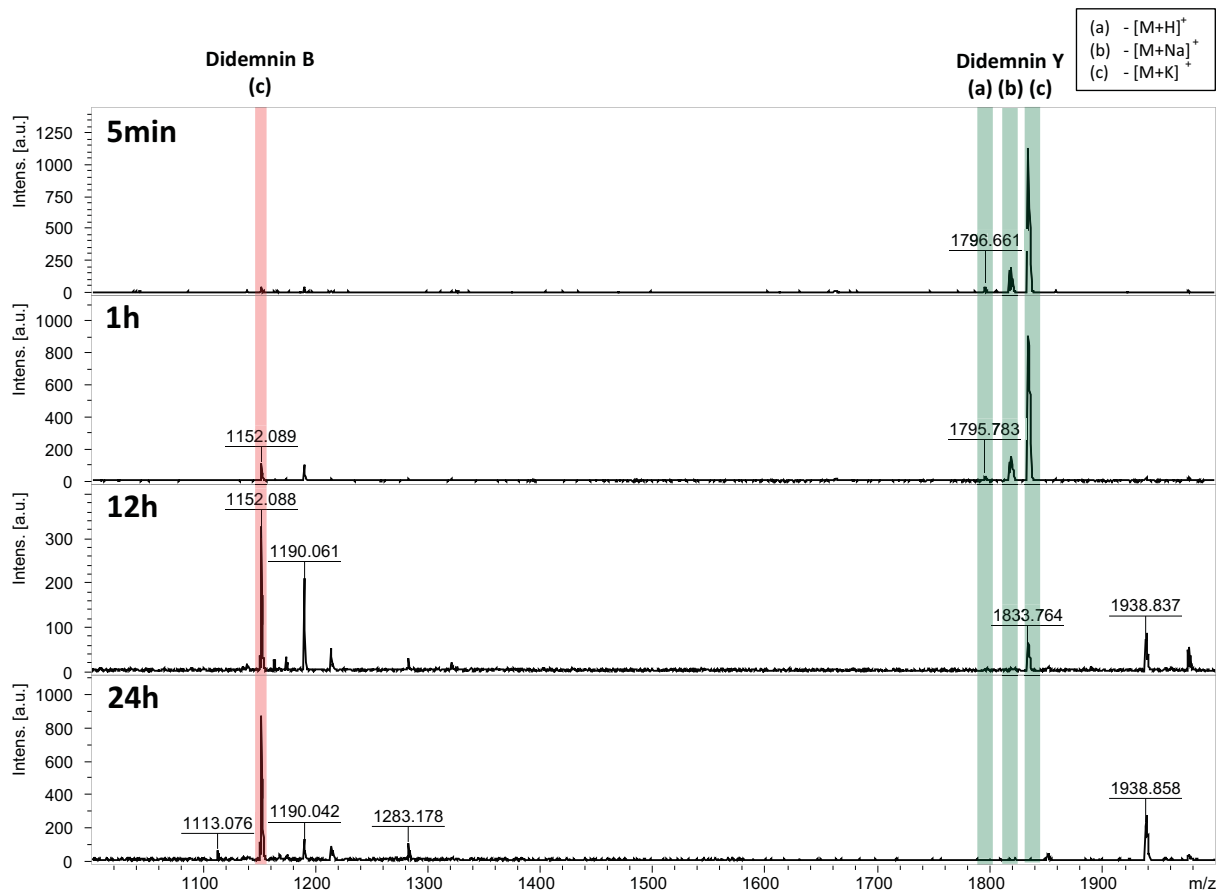**d**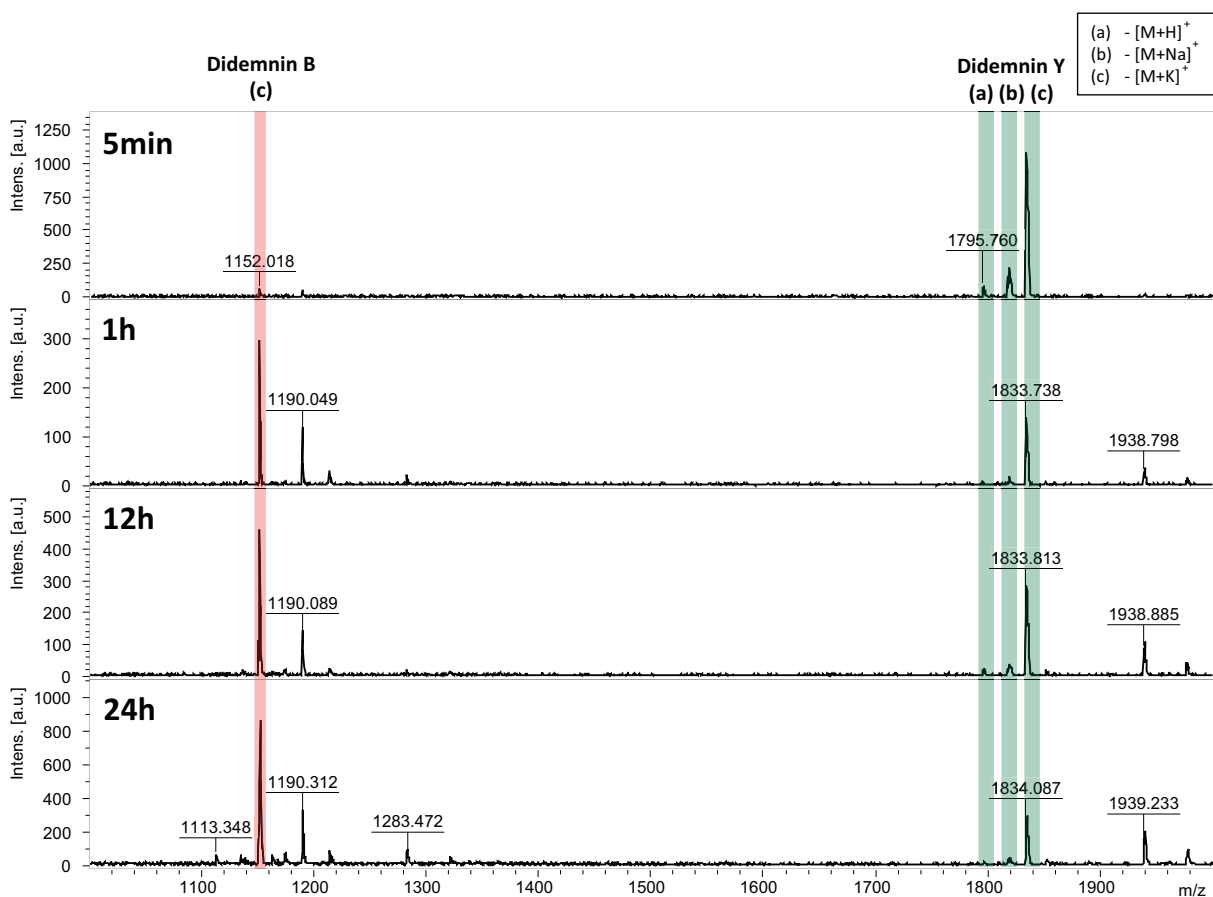

**Fig. S8. Didemnin precursor hydrolysis assay.** MALDI-TOF MS analysis of didemnin Y hydrolysis time course in presence of *Tistrella mobilis* secreted proteome ((c), 1d growth in liquid culture, >10kDa protein cutoff filter) and in presence of sterile GYP medium ((d), negative control).



**Table S1. General genome features of *Tistrella mobilis* KA081020-065**

| Features                | Chromosome | pTM1     | pTM2     | pTM3     | pTM4     |
|-------------------------|------------|----------|----------|----------|----------|
| Topology                | Circular   | Circular | Circular | Circular | Circular |
| Genome size (bp)        | 3919492    | 692874   | 690188   | 1126962  | 83885    |
| G+C content             | 68.15%     | 68.26%   | 67.61%   | 68.08%   | 67.26%   |
| CDs number              | 3565       | 605      | 602      | 942      | 72       |
| Coding density          | 89.08%     | 90.38%   | 88.92%   | 88.55%   | 85.06%   |
| Average CDs length (bp) | 979        | 1035     | 1019     | 1059     | 991      |
| Assigned function       | 2852       | 432      | 501      | 726      | 60       |
| Conserved hypothetical  | 472        | 101      | 71       | 165      | 9        |
| Hypothetical            | 244        | 72       | 30       | 51       | 3        |
| rRNA operons            | 2          | 0        | 0        | 1        | 1        |
| tRNA operons            | 41         | 0        | 1        | 9        | 3        |
